# Supplementary material for: The processing-module assembly strategy for continuous bio-oxidation of furan chemicals by integrated and coupled biotechnology
Source: Royal Society of Chemistry journal article supplement (doi:10.1039/d0gc03300f), 2021-01-01

### Supporting information:

**S. Figure1.** Colony comparison of various furan chemicals on agar-sorbitol-plates

(a) without furan chemical; (b) 10 g/L furfural addition; (c) 10 g/L FA addition;  
(d) 5 g/L furfural plus 5 g/L FA addition.

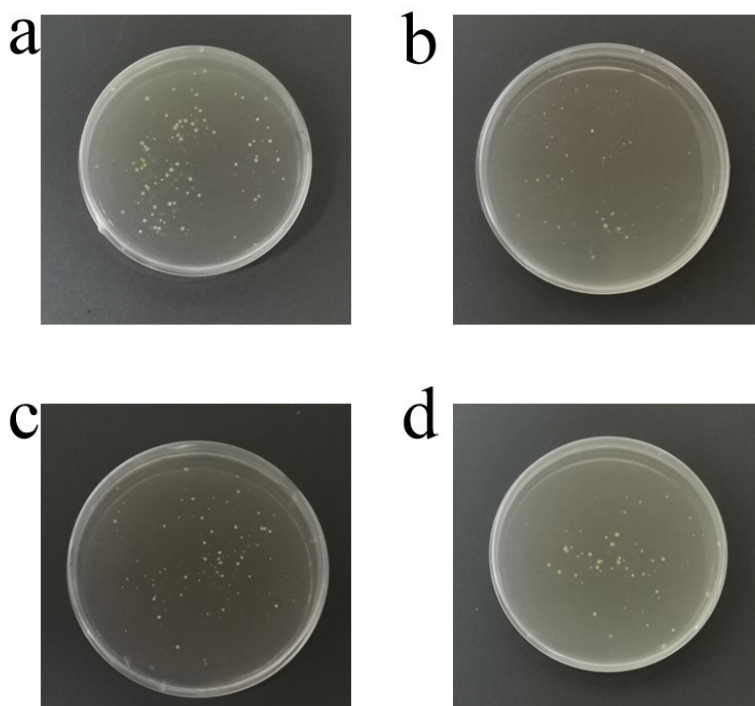

**S. Figure.2** SEM imagines comparison of cell figures in various furan chemicals mediums (a) Blank control medium; (b) 10 g/L furfural; (c) 10 g/L FA; (d) 5 g/L furfural plus 5 g/L FA

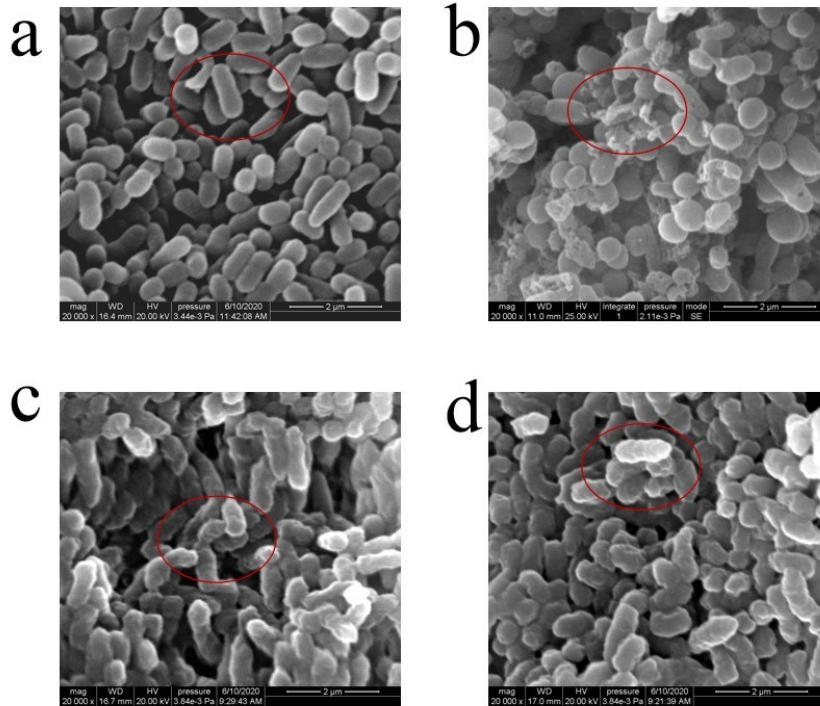

**S. Figure.3** The comparison of NMR characterization between crystal obtained from EDS step and FA standardsimulation diagram (a) The hydrogen spectrum of crystal and FA; (b) The carbon spectrum of crystal and FA

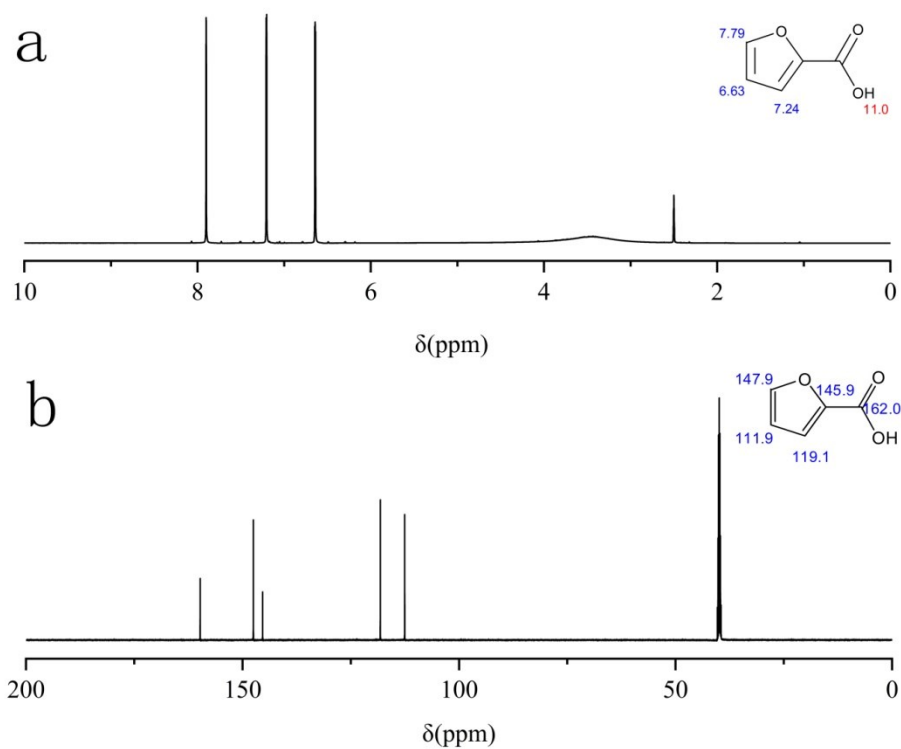

Supplement: d0gc03300f1.pdf [file d0gc03300f1.pdf]
